# Supplementary material for: Analysis of four DLX homeobox genes in autistic probands
Source: Springer Nature journal article supplement (doi:10.1186/1471-2156-6-52), 2005-11-02
Supplement: Additional file 2 [file 1471-2156-6-52-s2.pdf]

| Gene        | Variant        | Name                    | Change     | Autism Sample |       | Non-Autism Sample |       | PD Sample |       |
|-------------|----------------|-------------------------|------------|---------------|-------|-------------------|-------|-----------|-------|
|             |                |                         |            | n             | freq  | n                 | freq  | n         | freq  |
| DLX1-2 URE2 | 1              | NT_005403.14:g.23146815 | C -> T     | 161           | 0.003 | 54                | 0.000 | -         | -     |
|             | 2              | NT_005403.14:g.23147084 | A -> G     | 161           | 0.006 | 58                | 0.000 | -         | -     |
|             | 3              | NT_005403.14:g.23147129 | G -> A     | 162           | 0.006 | 58                | 0.017 | -         | -     |
|             | 4              | NT_005403.14:g.23147332 | G -> A     | 162           | 0.003 | 58                | 0.009 | -         | -     |
| DLX1        | 1              | -111G>T                 | G -> T     | 161           | 0.000 | 54                | 0.009 | -         | -     |
|             | *              | "142-284"               | G -> A     | 48            | 0.010 |                   |       |           |       |
|             | *              | "142-266"               | T -> A     | 48            | 0.010 |                   |       |           |       |
|             | 2              | *170T>C                 | T -> C     | 160           | 0.003 | 54                | 0.000 | -         | -     |
|             | 3              | *182C>G                 | C -> G     | 160           | 0.006 | 54                | 0.009 | -         | -     |
| DLX1-2 BR   | 1              | NT_005403.14:g.23165866 | C -> A     | 157           | 0.207 | 48                | 0.219 | -         | -     |
| DLX1-2 AR   | InDel-1        | NT_005403.14:g.23168271 | G -> -     | 161           | 0.003 | 54                | 0.000 | -         | -     |
| DLX2        | 1              | -36G>A                  | G -> A     | 158           | 0.465 | 54                | 0.481 | 188       | 0.383 |
|             | †              | rs6147027               | 48bp InDel |               |       |                   |       |           |       |
|             | InDel-1        | 138_139insAGC           | --> AGC    | 158           | 0.009 | 54                | 0.019 | 188       | 0.032 |
|             | †              | rs4410254               | C -> A     |               |       |                   |       |           |       |
|             | 2              | 394G>A                  | G -> A     | 157           | 0.003 | 52                | 0.010 | 188       | 0.000 |
|             | 3              | 401-156C>T              | C -> T     | 161           | 0.009 | 54                | 0.000 | -         | -     |
|             | 4              | 525A>G                  | A -> G     | 161           | 0.410 | 54                | 0.398 | -         | -     |
|             | †              | rs12616215              | T -> C     |               |       |                   |       |           |       |
|             | 5              | 585+100C>G              | C -> G     | 53            | 0.000 | 54                | 0.009 | -         | -     |
|             | †              | rs12616187              | T -> C     |               |       |                   |       |           |       |
|             | 6              | 670G>A                  | G -> A     | 161           | 0.003 | 53                | 0.000 | 188       | 0.000 |
|             | 7              | 987*1C>T                | C -> T     | 161           | 0.006 | 53                | 0.019 | 188       | 0.005 |
|             | 8              | 987*65C>T               | C -> T     | 161           | 0.003 | 53                | 0.009 | 188       | 0.000 |
|             | 9              | 987*154C>T              | C -> T     | 161           | 0.003 | 53                | 0.009 | 188       | 0.000 |
|             | DLX5           | 1                       | 252C>G     | C -> G        | 152   | 0.003             | 48    | 0.010     | -     |
| 2           |                | 306C>T                  | C -> T     | 152           | 0.003 | 48                | 0.010 | -         | -     |
| †           |                | rs1207733               | C -> T     |               |       |                   |       |           |       |
| 3           |                | 541-44C>G               | C -> G     | 161           | 0.000 | 54                | 0.000 | 187       | 0.003 |
| 4           |                | 541-31C>T               | C -> T     | 161           | 0.000 | 54                | 0.000 | 187       | 0.003 |
| 5           |                | 541-10C>T               | C -> T     | 161           | 0.003 | 54                | 0.000 | 187       | 0.003 |
| 6           |                | 685T>C                  | T -> C     | 161           | 0.003 | 54                | 0.000 | 187       | 0.000 |
| DLX5-6 I1   | 7              | 702C>A                  | C -> A     | 161           | 0.012 | 54                | 0.000 | 187       | 0.003 |
|             | 1              | NT_007933.13:g.21875347 | A -> G     | 158           | 0.003 | 54                | 0.000 | -         | -     |
| DLX6        | †              | rs5885995               | GCA InDel  |               |       |                   |       |           |       |
|             | 1              | 82+57C>T                | C -> T     | 150           | 0.007 | 53                | 0.000 | -         | -     |
|             | 2              | 82+58C>T                | C -> T     | 150           | 0.007 | 53                | 0.009 | -         | -     |
|             | 3              | 82+59C>T                | C -> T     | 150           | 0.003 | 53                | 0.000 | -         | -     |
|             | 4              | 82+103C>T               | C -> T     | 150           | 0.000 | 53                | 0.019 | -         | -     |
|             | 5              | 82+124C>T               | C -> T     | 150           | 0.000 | 53                | 0.009 | -         | -     |
|             | 6              | 82+160C>T               | C -> T     | 150           | 0.003 | 53                | 0.000 | -         | -     |
|             | †              | rs4141284               | T -> G     |               |       |                   |       |           |       |
|             | 7              | 83-85A>C                | A -> C     | 160           | 0.034 | 53                | 0.047 | -         | -     |
| **          | "intron 1 C/T" | C -> T                  |            | 0.32          |       |                   |       |           |       |
| 8           | *9A>G          | A -> G                  | 161        | 0.009         | 51    | 0.000             | -     | -         |       |
